# Supplementary material
Source: HighWire-hosted journal article supplement (https://dmd.aspetjournals.org/content/suppl/2020/07/26/dmd.120.000083)
Supplement: 83_Supplemental_data.pdf [file 83_Supplemental_data.pdf]

---

**Supplemental Data to *Drug Metabolism and Disposition***

**Multi-omics profiling reveals protective function of *Schisandra* lignans  
against acetaminophen-induced hepatotoxicity**

Caixia Yan<sup>1a</sup>, Huimin Guo<sup>1a</sup>, Qingqing Ding<sup>1b</sup>, Yuhao Shao<sup>a</sup>, Dian Kang<sup>a</sup>, Tengjie Yu<sup>a</sup>, Changjian Li<sup>a</sup>,  
Haoran Huang<sup>a</sup>, Yisha Du<sup>a</sup>, He Wang<sup>a</sup>, Kangrui Hu<sup>a</sup>, Lin Xie<sup>a</sup>, Guangji Wang<sup>\*\*a</sup>, Yan Liang<sup>\*a</sup>

*a. Key Lab of Drug Metabolism & Pharmacokinetics, State Key Laboratory of Natural Medicines, China Pharmaceutical University, Tongjiaxiang 24, Nanjing 210009, P.R. China*

*b. Department of Geriatric Oncology, First Affiliated Hospital of Nanjing Medical University (Jiangsu People's Hospital), No. 300 Guangzhou Road, Nanjing 210029, P.R. China*

\* Corresponding author. Tel.: +86 25 83271060; fax: +86 25 83271060;

E-mail addresses: liangyan0679@163.com; guangjiwang@hotmail.com

<sup>1</sup> These authors contributed equally to this work.

---

## Captions of Supplemental Figures and Tables

**Table S1** The contents of schizandrol A, schizandrol B, schisantherin A, schizandrin A, schizandrin B in SLE.

**Table S2** The primer sets for the target genes.

**Figure S1** The effect of SLE on liver pathological sections (A), intrahepatic ALT (B) and AST (C) of mice via intragastric administration of SLE (500 mg/kg) twice a day for 3 consecutive days.

**Table S3** Metabolism pathways of APAP induced hepatotoxicity and hepatoprotective effect of SLE.

**Table S4** Fold change of DAGs in APAP-induced liver injury and SLE-treated mice.

**Table S5** Fold change of TAGs in APAP-induced liver injury and SLE-treated mice.

---

**Table S1** The contents of schizandrol A, schizandrol B, schisantherin A, schizandrin A, schizandrin B in SLE.

---

| <b>Schisandra Lignans</b> | <b>Content (%)</b> |
|---------------------------|--------------------|
| <b>Schizandrol A</b>      | <b>0.047</b>       |
| <b>Schizandrol B</b>      | <b>0.397</b>       |
| <b>Schisantherin A</b>    | <b>4.610</b>       |
| <b>Schizandrin A</b>      | <b>7.670</b>       |
| <b>Schizandrin B</b>      | <b>0.019</b>       |

---

**Table S2** The primer sets for the target genes.

|              | <b>Forward</b>            | <b>Reverse</b>            |
|--------------|---------------------------|---------------------------|
| FASN         | GGAGGTGGTGATAGCCGGTAT     | TGGGTAATCCATAGAGCCCAG     |
| DGAT2        | TGGGTCCAGAAGAAGTTCAGAAGTA | ACCTCAGTCTCTGGAAGGCCAAAT  |
| ACC1         | AATGAACGTGCAATCCGATTTG    | ACTCCACATTTGCGTAATTGTTG   |
| CD36         | GAACCACTGCTTTCAAAAAGTGG   | TGCTGTTCTTTGCCACGTCA      |
| PKC $\alpha$ | CAAGGGATGAAATGTGACACC     | CCTCTTCTCTGTGTGATCCATTC   |
| PKC $\beta$  | CCTCGGGAAGCAGAAAAGTAAC    | TCCATACTGAGTTTTGGTGGAG    |
| PKC $\gamma$ | GTCGACTGGTGGTCTTTTGG      | CTCATCTTCCCATCAAAGG       |
| PKC $\delta$ | CAAGAAGAACAACGGCAAGG      | TGCACACACATCAGCACCT       |
| PKC $\theta$ | GGCCAAGGACCTTCTAGTGA      | TCCCAGTTGATCTCTCGAAAC     |
| ACC2         | CCTTTGGCAACAAGCAAGGTA     | AGTCGTACACATAGGTGGTCC     |
| FATP5        | GACCACTGGACTCCCAAAGC      | GACAGCACGTTGCTCACTTGT     |
| L-FABP       | CCATGAACTTCTCCGGCAAGTACC  | CTTTGGGTCCATAGGTGATGGTGAG |

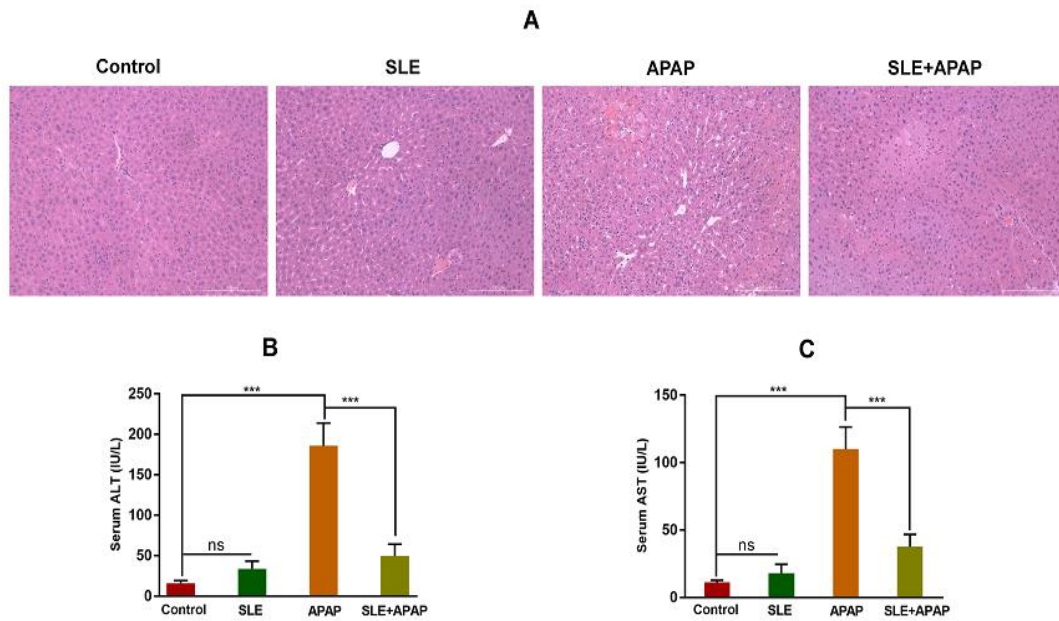

**Figure S1** The effect of SLE on liver pathological sections (A), intrahepatic ALT (B) and AST (C) of mice via intragastric administration of SLE (500 mg/kg) twice a day for 3 consecutive days.

---

**Table S3 Metabolism pathways of APAP induced hepatotoxicity and hepatoprotective effect of SLE**

|                                        | <b>Total</b> | <b>Hits</b> | <b>P value</b> |
|----------------------------------------|--------------|-------------|----------------|
| Urea Cycle                             | 25           | 8           | 3.28E-07       |
| Ammonia Recycling                      | 27           | 7           | 9.90E-06       |
| Arginine and Proline Metabolism        | 47           | 8           | 5.86E-05       |
| Purine Metabolism                      | 66           | 9           | 0.000115       |
| Glutamate Metabolism                   | 44           | 7           | 0.000291       |
| Alanine Metabolism                     | 13           | 4           | 0.000508       |
| Malate-Aspartate Shuttle               | 8            | 3           | 0.001502       |
| Aspartate Metabolism                   | 30           | 5           | 0.00197        |
| Gluconeogenesis                        | 32           | 5           | 0.002659       |
| Glucose-Alanine Cycle                  | 10           | 3           | 0.003079       |
| Nicotinate and Nicotinamide Metabolism | 34           | 5           | 0.003509       |
| Phenylalanine and Tyrosine Metabolism  | 21           | 4           | 0.003545       |
| Glutathione Metabolism                 | 22           | 4           | 0.004235       |
| Selenoamino Acid Metabolism            | 26           | 4           | 0.007905       |
| Galactose Metabolism                   | 33           | 4           | 0.018465       |
| Glycine and Serine Metabolism          | 52           | 5           | 0.02167        |
| Phenylacetate Metabolism               | 8            | 2           | 0.024684       |
| Lactose Degradation                    | 9            | 2           | 0.031107       |
| Glycolysis                             | 23           | 3           | 0.034205       |
| Cysteine Metabolism                    | 23           | 3           | 0.034205       |
| Starch and Sucrose Metabolism          | 26           | 3           | 0.047052       |

---

**Table S4 Fold change of DAGs in APAP-induced liver injury and SLE-treated mice**

| Name               | Formula                                          | Mass     | A vs C | P value | AS vs A | P value | AS vs C | P value |
|--------------------|--------------------------------------------------|----------|--------|---------|---------|---------|---------|---------|
| DAG(12:0/18:2/0:0) | OHC <sub>33</sub> H <sub>59</sub> O <sub>4</sub> | 554.4735 | 2.99   | 0.01    | 0.68    | 0.13    | 2.03    | 0.02    |
| DAG(16:1/16:0/0:0) | OHC <sub>35</sub> H <sub>65</sub> O <sub>4</sub> | 584.5226 | 2.29   | 0.01    | 0.33    | 0.00    | 0.76    | 0.14    |
| DAG(16:0/18:1/0:0) | OHC <sub>37</sub> H <sub>69</sub> O <sub>4</sub> | 612.5531 | 2.42   | 0.01    | 0.30    | 0.00    | 0.73    | 0.14    |
| DAG(16:0/18:2/0:0) | OHC <sub>37</sub> H <sub>67</sub> O <sub>4</sub> | 610.5386 | 3.14   | 0.02    | 0.37    | 0.01    | 1.16    | 0.56    |
| DAG(16:1/18:2/0:0) | OHC <sub>37</sub> H <sub>65</sub> O <sub>4</sub> | 608.5213 | 3.61   | 0.01    | 0.38    | 0.01    | 1.37    | 0.32    |
| DAG(18:0/18:1/0:0) | OHC <sub>39</sub> H <sub>73</sub> O <sub>4</sub> | 640.5865 | 1.52   | 0.05    | 0.55    | 0.02    | 0.84    | 0.18    |
| DAG(18:1/18:1/0:0) | OHC <sub>39</sub> H <sub>71</sub> O <sub>4</sub> | 638.5703 | 3.13   | 0.05    | 0.30    | 0.02    | 0.94    | 0.64    |
| DAG(18:1/18:2/0:0) | OHC <sub>39</sub> H <sub>69</sub> O <sub>4</sub> | 636.5556 | 6.00   | 0.02    | 0.27    | 0.01    | 1.62    | 0.01    |
| DAG(18:2/18:2/0:0) | OHC <sub>39</sub> H <sub>67</sub> O <sub>4</sub> | 634.5397 | 4.20   | 0.05    | 0.35    | 0.04    | 1.47    | 0.05    |
| DAG(18:2/18:3/0:0) | OHC <sub>39</sub> H <sub>65</sub> O <sub>4</sub> | 632.5227 | 3.84   | 0.03    | 0.34    | 0.04    | 1.31    | 0.31    |
| DAG(18:2/18:4/0:0) | OHC <sub>39</sub> H <sub>63</sub> O <sub>4</sub> | 630.5104 | 3.53   | 0.05    | 0.34    | 0.04    | 1.20    | 0.41    |
| DAG(18:1/20:1/0:0) | OHC <sub>41</sub> H <sub>75</sub> O <sub>4</sub> | 666.6028 | 1.05   | 0.84    | 0.33    | 0.00    | 0.35    | 0.02    |
| DAG(18:2/20:1/0:0) | OHC <sub>41</sub> H <sub>73</sub> O <sub>4</sub> | 664.5855 | 2.07   | 0.01    | 0.31    | 0.00    | 0.64    | 0.03    |
| DAG(18:0/20:4/0:0) | OHC <sub>41</sub> H <sub>71</sub> O <sub>4</sub> | 662.5696 | 1.77   | 0.04    | 0.62    | 0.03    | 1.10    | 0.62    |
| DAG(18:1/20:4/0:0) | OHC <sub>41</sub> H <sub>69</sub> O <sub>4</sub> | 660.5528 | 2.64   | 0.04    | 0.45    | 0.03    | 1.19    | 0.55    |
| DAG(16:0/22:6/0:0) | OHC <sub>41</sub> H <sub>67</sub> O <sub>4</sub> | 658.5382 | 1.61   | 0.01    | 0.81    | 0.18    | 1.30    | 0.38    |
| DAG(18:2/20:5/0:0) | OHC <sub>41</sub> H <sub>65</sub> O <sub>4</sub> | 656.5233 | 2.87   | 0.06    | 0.50    | 0.16    | 1.44    | 0.09    |
| DAG(18:1/20:4/0:0) | OHC <sub>43</sub> H <sub>73</sub> O <sub>4</sub> | 688.5881 | 1.31   | 0.32    | 0.66    | 0.09    | 0.86    | 0.18    |
| DAG(18:0/22:6/0:0) | OHC <sub>43</sub> H <sub>71</sub> O <sub>4</sub> | 686.5698 | 2.14   | 0.02    | 0.86    | 0.50    | 1.84    | 0.03    |
| DAG(18:1/22:6/0:0) | OHC <sub>43</sub> H <sub>69</sub> O <sub>4</sub> | 684.5538 | 3.15   | 0.05    | 0.36    | 0.03    | 1.13    | 0.59    |
| DAG(18:2/22:6/0:0) | OHC <sub>43</sub> H <sub>67</sub> O <sub>4</sub> | 682.5379 | 4.75   | 0.03    | 0.48    | 0.04    | 2.28    | 0.03    |

**Table S5 Fold change of TAGs in APAP-induced liver injury and SLE-treated mice**

| Name     | Formula                                         | Mass     | A vs C | P value | AS vs A | P value | AS vs C | P value |
|----------|-------------------------------------------------|----------|--------|---------|---------|---------|---------|---------|
| TAG 42:1 | C <sub>45</sub> H <sub>84</sub> O <sub>6</sub>  | 720.6268 | 2.49   | 0.03    | 0.89    | 0.62    | 2.22    | 0.03    |
| TAG 44:1 | C <sub>47</sub> H <sub>88</sub> O <sub>6</sub>  | 748.6581 | 2.14   | 0.00    | 0.68    | 0.02    | 1.46    | 0.01    |
| TAG 44:2 | C <sub>47</sub> H <sub>86</sub> O <sub>6</sub>  | 746.6424 | 6.77   | 0.02    | 0.94    | 0.84    | 6.36    | 0.02    |
| TAG 46:1 | C <sub>49</sub> H <sub>92</sub> O <sub>6</sub>  | 776.6894 | 3.17   | 0.01    | 0.56    | 0.04    | 1.78    | 0.02    |
| TAG 46:2 | C <sub>49</sub> H <sub>90</sub> O <sub>6</sub>  | 774.6737 | 7.23   | 0.01    | 0.71    | 0.26    | 5.13    | 0.01    |
| TAG 48:1 | C <sub>51</sub> H <sub>96</sub> O <sub>6</sub>  | 804.7207 | 3.11   | 0.00    | 0.59    | 0.10    | 1.83    | 0.02    |
| TAG 48:2 | C <sub>51</sub> H <sub>94</sub> O <sub>6</sub>  | 802.705  | 6.25   | 0.03    | 0.37    | 0.09    | 2.31    | 0.03    |
| TAG 48:3 | C <sub>51</sub> H <sub>92</sub> O <sub>6</sub>  | 800.6894 | 6.85   | 0.01    | 0.46    | 0.05    | 3.15    | 0.02    |
| TAG 50:1 | C <sub>53</sub> H <sub>100</sub> O <sub>6</sub> | 832.752  | 1.96   | 0.03    | 0.60    | 0.07    | 1.18    | 0.11    |
| TAG 50:2 | C <sub>53</sub> H <sub>98</sub> O <sub>6</sub>  | 830.7363 | 2.41   | 0.01    | 0.55    | 0.04    | 1.33    | 0.09    |
| TAG 50:3 | C <sub>53</sub> H <sub>96</sub> O <sub>6</sub>  | 828.7207 | 3.53   | 0.01    | 0.42    | 0.03    | 1.48    | 0.04    |
| TAG 50:4 | C <sub>53</sub> H <sub>94</sub> O <sub>6</sub>  | 826.705  | 4.57   | 0.01    | 0.48    | 0.06    | 2.19    | 0.03    |
| TAG 50:5 | C <sub>53</sub> H <sub>92</sub> O <sub>6</sub>  | 824.6894 | 5.63   | 0.00    | 0.65    | 0.13    | 3.66    | 0.01    |
| TAG 52:4 | C <sub>55</sub> H <sub>98</sub> O <sub>6</sub>  | 854.7363 | 1.33   | 0.04    | 0.80    | 0.04    | 1.06    | 0.14    |
| TAG 52:5 | C <sub>55</sub> H <sub>96</sub> O <sub>6</sub>  | 852.7207 | 2.83   | 0.00    | 0.74    | 0.20    | 2.09    | 0.03    |
| TAG 52:6 | C <sub>55</sub> H <sub>94</sub> O <sub>6</sub>  | 850.705  | 3.41   | 0.01    | 0.65    | 0.15    | 2.22    | 0.03    |
| TAG 52:7 | C <sub>55</sub> H <sub>92</sub> O <sub>6</sub>  | 848.6894 | 4.60   | 0.01    | 0.71    | 0.25    | 3.27    | 0.02    |
| TAG 52:8 | C <sub>55</sub> H <sub>90</sub> O <sub>6</sub>  | 846.6737 | 4.27   | 0.01    | 0.86    | 0.56    | 3.67    | 0.02    |
| TAG 54:3 | C <sub>57</sub> H <sub>104</sub> O <sub>6</sub> | 884.7833 | 2.01   | 0.00    | 0.73    | 0.07    | 1.47    | 0.05    |
| TAG 54:4 | C <sub>57</sub> H <sub>102</sub> O <sub>6</sub> | 882.7676 | 1.65   | 0.01    | 0.74    | 0.03    | 1.22    | 0.09    |
| TAG 54:5 | C <sub>57</sub> H <sub>100</sub> O <sub>6</sub> | 880.752  | 1.66   | 0.02    | 0.78    | 0.07    | 1.29    | 0.08    |
| TAG 54:6 | C <sub>57</sub> H <sub>98</sub> O <sub>6</sub>  | 878.7363 | 2.04   | 0.03    | 0.93    | 0.71    | 1.90    | 0.03    |
| TAG 54:7 | C <sub>57</sub> H <sub>96</sub> O <sub>6</sub>  | 876.7207 | 1.93   | 0.01    | 0.87    | 0.57    | 1.68    | 0.02    |
| TAG 56:6 | C <sub>59</sub> H <sub>102</sub> O <sub>6</sub> | 906.7676 | 1.68   | 0.02    | 1.11    | 0.55    | 1.86    | 0.02    |
| TAG 58:8 | C <sub>61</sub> H <sub>102</sub> O <sub>6</sub> | 930.7676 | 1.84   | 0.04    | 1.12    | 0.46    | 2.06    | 0.02    |
